# Supplementary material for: Downregulation of PAICS due to loss of chromosome 4q is associated with poor survival in stage III colorectal cancer
Source: PubMed Central journal article supplement (PMC7888640; doi:10.1371/journal.pone.0247169), 2021-02-17
Supplement: pone.0247169.s001.pdf [file pone.0247169.s001.pdf]

**Table S1. Cohort characteristics**

| Cohorts                  | total | FMU-RNA | FMU-FFPE             | MSK                           | CIT                                 | TCGA                                                 | Oslo                         | CCLC                                                            |
|--------------------------|-------|---------|----------------------|-------------------------------|-------------------------------------|------------------------------------------------------|------------------------------|-----------------------------------------------------------------|
| Platforms                |       | qRT-PCR | immunohistochemistry | Affymetrix Human Genome U133A | Affymetrix Human Genome U133Plus2.0 | Illumina HiSeq_RNAS eqV2<br>Affymetrix SNP Array 6.0 | Affymetrix Human Exon 1.0 ST | Affymetrix Human Genome U133Plus2.0<br>Affymetrix SNP Array 6.0 |
| GEO accession            |       | -       | -                    | GSE41258                      | GSE39582                            | -                                                    | GSE24551<br>GSE30378         | GSE36139                                                        |
| Total number of samples  | 2223  | 160     | 252                  | 355                           | 566                                 | 578                                                  | 255                          | 57                                                              |
| Normal colorectal mucosa | 134   | 80      | (235)                | 54                            | 0                                   | 0                                                    | 0                            | 0                                                               |
| Colorectal adenoma       | 49    | 0       | 0                    | 49                            | 0                                   | 0                                                    | 0                            | 0                                                               |
| Stage 0 primary CRC      | 10    | 0       | 6                    | 0                             | 4                                   | 0                                                    | 0                            | 0                                                               |
| Stage I primary CRC      | 220   | 12      | 44                   | 28                            | 33                                  | 103                                                  | 0                            | 0                                                               |
| Stage II primary CRC     | 803   | 34      | 93                   | 50                            | 264                                 | 220                                                  | 142                          | 0                                                               |
| Stage III primary CRC    | 626   | 20      | 69                   | 49                            | 205                                 | 170                                                  | 113                          | 0                                                               |
| Stage IV primary CRC     | 257   | 14      | 40                   | 58                            | 60                                  | 85                                                   | 0                            | 0                                                               |
| Metastatic CRC           | 67    | 0       | 0                    | 67                            | 0                                   | 0                                                    | 0                            | 0                                                               |
| CRC cell line            | 57    | 0       | 0                    | 0                             | 0                                   | 0                                                    | 0                            | 57                                                              |
| MSI status               |       |         |                      |                               |                                     |                                                      |                              |                                                                 |
| MSI-H                    | 220   | 0       | 0                    | 35                            | 75                                  | 62                                                   | 28                           | 20                                                              |
| MSS/MSI-L                | 1205  | 0       | 0                    | 133                           | 444                                 | 384                                                  | 213                          | 31                                                              |
| Unknown                  | 548   | 80      | 252                  | 17                            | 47                                  | 132                                                  | 14                           | 6                                                               |

Abbreviations: FMU, Fukushima Medical University; FFPE, formalin-fixed paraffin-embedded; MSK, Memorial Sloan-Kettering Cancer Center; CIT, Cartes d'Identité des Tumeurs program; TCGA, The Cancer Genome Atlas; CCLC, Cancer Cell Line Encyclopedia; GEO, Gene Expression Omnibus; qRT-PCR, quantitative RT-PCR; MSI, microsatellite instability; MSI-H, high-level microsatellite instability; MSS, microsatellite stable; MSI-L, low-level microsatellite instability
