# Supplementary material for: Downregulation of PAICS due to loss of chromosome 4q is associated with poor survival in stage III colorectal cancer
Source: PubMed Central journal article supplement (PMC7888640; doi:10.1371/journal.pone.0247169), 2021-02-17
Supplement: pone.0247169.s002.pdf [file pone.0247169.s002.pdf]

**Table S2. Univariate and Multivariate Cox regression for cancer-specific survival in patients with stage II and III colorectal cancer**

| Variable                     |                                    | Univariate |              |          | Multivariate† |              |          |
|------------------------------|------------------------------------|------------|--------------|----------|---------------|--------------|----------|
|                              |                                    | HR         | 95% CI       | <i>P</i> | HR            | 95% CI       | <i>P</i> |
| PAICS (immunohistochemistry) | Negative vs Positive               | 2.67       | 0.94 – 7.62  | 0.066    | 2.84          | 0.89 – 9.13  | 0.079    |
| Histological differentiation | Poorly-Mucinous vs Well-Moderately | 5.48       | 1.90 – 15.81 | 0.002    | 3.33          | 1.00 – 11.11 | 0.050    |
| Tumor invasion               | T4 vs T1-T3                        | 2.95       | 1.02 – 8.49  | 0.046    | 2.60          | 0.79 – 8.61  | 0.118    |
| Lymph node metastasis        | Present vs Absent                  | 2.55       | 0.85 – 7.61  | 0.093    | 2.39          | 0.79 – 7.23  | 0.124    |
| Age                          | Continuous                         | 1.02       | 0.97 – 1.07  | 0.427    |               |              |          |
| Gender                       | Female vs Male                     | 0.50       | 0.17 – 1.43  | 0.196    |               |              |          |
| Location                     | Light colon/Rectum vs Right colon  | 4.52       | 0.59 – 34.57 | 0.146    |               |              |          |
| Adjuvant chemotherapy        | Yes vs No                          | 3.13       | 0.70 – 14.00 | 0.136    |               |              |          |

† Variables with p-value less than 0.1 in the univariate analysis were evaluated in multivariate analysis
